# Supplementary material for: Everolimus in Heart Transplantation: An Update
Source: Hindawi journal article supplement (doi:10.1155/2013/683964), 2013-01-01
Supplement: f1 [file 683964.f1.pdf]

## **Everolimus in heart transplantation: An update**

Stephan W Hirt, MD, PhD<sup>1</sup>, Christoph Bara, MD, PhD<sup>2</sup>, Markus J Barten, MD, PhD<sup>3</sup>,  
Tobias Deuse, MD PhD<sup>4</sup>, Andreas O Doesch, MD PhD<sup>5</sup>, Ingo Kaczmarek, MD PhD<sup>6</sup>,  
Uwe Schulz, MD<sup>7</sup>, Jörg Stypmann, MD PhD<sup>8</sup>, Assad Haneya, MD PhD<sup>9</sup>, Hans B  
Lehmkuhl, MD, PhD<sup>10</sup>

1 Department of Cardiothoracic Surgery, University Hospital Regensburg, Franz-Josef-Strauß-Allee 11, D-93053 Regensburg, Germany

2 Division of Cardiovascular, Thoracic and Transplantation Surgery, Hannover Medical School, Carl-Neuberg-Straße 1, 30625 Hannover, Germany

3 Department of Cardiac Surgery, University Hospital Leipzig, Heart Center, 04289 Leipzig, Germany

4 Department of Cardiovascular Surgery, University Heart Center Hamburg, Martinistr 52, 20246 Hamburg, Germany

5 Department of Cardiology, University Hospital Heidelberg, Im Neuenheimer Feld 410, 69120 Heidelberg, Germany

6 Department of Cardiac Surgery, Munich Transplantation Center, Klinikum Grosshadern LMU, Marchioninistraße 15, 81377 Munich, Germany

7 Department of Thoracic and Cardiovascular Surgery, Heart and Diabetes Center North Rhine-Westphalia, Georgstraße 11, 32545 Bad Oeynhausen, Germany

8 Department of Cardiovascular Medicine, Division of Cardiology, University Hospital Münster, Albert-Schweitzer-Str 33, D-48149 Münster, Germany

9 Department of Cardiovascular Surgery, University Hospital Kiel, Arnold-Heller-Strasse 7, 24105 Kiel, Germany

10 Department of Cardiovascular and Thoracic Surgery, German Heart Center Berlin, Augustenburger Platz 1, 13353 Berlin, Germany

*Author email addresses*

|             |                                       |
|-------------|---------------------------------------|
| SW Hirt     | stephan.hirt@klinik.uni-regensburg.de |
| C Bara      | bara.christoph@mh-hannover.de         |
| MJ Barten   | bartenm@gmail.com                     |
| T Deuse     | t.deuse@uke.de                        |
| AO Doesch   | Andreas.Doesch@med.uni-heidelberg.de  |
| I Kaczmarek | Ingo.Kaczmarek@med.uni-muenchen.de    |
| U Schulz    | USchulz@hdz-nrw.de                    |
| J Stypmann  | stypmann@ukmuenster.de                |
| A Haneya    | Assad.Haneya@uksh-kiel.de             |
| HB Lehmkuhl | lehmkuhl@DHZB.de                      |

*Correspondence:*

Stephan W. Hirt MD PhD

Regensburg University Hospital, Department of Cardiac Surgery

Franz-Josef-Strauß-Allee 11

D-93053 Regensburg, Germany

Phone: +49 941 / 944 9827 Fax: +49 941 / 944 9811

E-mail: stephan.hirt@klinik.uni-regensburg.de

## **Abstract**

The evidence base relating to the use of everolimus in heart transplantation has expanded considerably in recent years, providing clinically relevant information regarding its use in clinical practice. Unless there are special considerations to take into account, all *de novo* heart transplant patients can be regarded as potential candidates for immunosuppression with everolimus and reduced-exposure calcineurin inhibitor therapy. Caution about use of everolimus immediately after transplantation should be exercised in certain patients with risk of severe proteinuria, with poor wound healing or with uncontrolled severe hyperlipidemia. Initiation of everolimus in the early phase post-transplant is not advisable in patients with severe pre-transplant end-organ dysfunction, or in patients on a left ventricular assist device pre-transplant who are at high risk of infection or of wound healing complications. The most frequent reason for introducing everolimus in maintenance heart transplant patients is to support minimization or withdrawal of calcineurin inhibitor therapy, for example due to impaired renal function or malignancy. Due to its potential to inhibit progression of cardiac allograft vasculopathy and to reduce cytomegalovirus infection, everolimus should be initiated as soon as possible after heart transplantation. Immediate and adequate reduction of CNIs exposure is mandatory from the start of everolimus therapy.

**Keywords:** everolimus, mTOR, heart transplantation, cardiac transplantation, *de novo*, maintenance, A2310

## Introduction

The mammalian target-of-rapamycin inhibitor (mTOR) everolimus has been licensed in Europe since 2004 for the prevention of organ rejection in adult patients at low to moderate immunological risk receiving an allogeneic kidney, liver or heart transplant. Everolimus is currently the only mTOR inhibitor approved for use in heart transplantation. It was developed to improve the pharmacokinetics of the mTOR inhibitor sirolimus through a stable 2-hydroxyethyl chain substitution at position 40 of the sirolimus molecule [1]. This change confers a shorter half-life, permitting faster reduction or elimination of everolimus exposure and obviating the need for a loading dose.

In a pivotal double-blind, phase 3 (B253) trial in *de novo* heart transplant recipients published in 2003, Eisen *et al* demonstrated that everolimus provided equivalent immunosuppressive efficacy to azathioprine [2]. Inhibition of vascular smooth muscle cell proliferation by everolimus reduced intimal thickening and lowered the incidence of cardiac allograft vasculopathy. Based on these findings and early clinical experience in Germany and Austria, recommendations on the use of everolimus in heart transplantation were developed at two expert meetings held in 2004 [3] and 2006 [4]. Since then, the evidence base relating to everolimus in heart transplantation has expanded substantially with additional randomized studies in *de novo* [5] and maintenance [6-8] heart transplant patients. Recently, results from the 24-month, international, randomized, open-label study A2310 [9] have been published, re-focusing attention on the use of everolimus in *de novo* heart transplant patients. This article considers the current data set and considers the implications for use of everolimus in this setting.

## Everolimus in heart transplant recipients: the key studies

### *Study designs*

The key studies evaluating the *de novo* use of everolimus following heart transplantation, and their primary endpoints, are summarized in Table 1. In a 24-month, multicenter, randomized, double-blind, double-dummy, phase 3 study (B253), the efficacy, safety and tolerability of two fixed doses of everolimus (1.5 and 3.0mg/day) were compared to azathioprine in 634 *de novo* heart transplant recipients [2]. All patients received a triple drug regimen that included standard-dose cyclosporine (CsA) and corticosteroids. In the multicenter, randomized A2411 trial (n=176), the immunosuppressive regimen was changed to concentration-controlled everolimus (initial dose 1.5mg/day, target trough level [C<sub>0</sub>] 3–8ng/mL) and reduced-exposure CsA to examine whether renal toxicity was reduced compared to mycophenolate mofetil (MMF, 3g/day) with standard CsA [5]. Both groups received steroids and antibody induction therapy according to local practice. In an observational study by Lehmkuhl *et al*, everolimus (C<sub>0</sub> 3–8ng/mL) with low-exposure CsA was compared to MMF (mean dose 1.25–2.5g/day) in combination with standard CsA in 52 *de novo* heart transplant patients [10]. All patients received induction with antithymocyte globulin (two dose of 2.5mg/kg) and steroids. Mean CsA C<sub>0</sub> decreased by 58% from week 2 to month 12 in the everolimus group versus 35% in the MMF cohort (mean [SD] at month 12: 101 [SD] ng/mL) versus 160 [41] ng/mL).

The A2310 trial was an international, open-label, 24-month study in which 721 *de novo* heart transplant recipients were randomized to (i) standard everolimus trough concentration (3–8ng/mL) or to (ii) high everolimus trough concentration (6–12ng/mL) with reduced-dose CsA, or to (iii) MMF 3g/day with standard-dose CsA [9]. All patients received corticosteroids with or without induction according to center practice. Randomization to the high everolimus trough concentration group (6–12ng/mL) was stopped prematurely due to higher early mortality, and data from this group were not

analyzed in detail. The primary efficacy endpoint was the composite efficacy failure (biopsy-proven acute rejection of ISHLT grade  $\geq 3A$ , acute rejection episodes associated with hemodynamic compromise, graft loss/re-transplant, death, and loss to follow-up) and the main secondary efficacy endpoint was the incidence rate of graft loss/re-transplant, death or loss to follow-up, both at month 12 [9].

### *Efficacy results*

According to the primary efficacy endpoints, everolimus was significantly more efficacious than azathioprine at month 6 post-transplant when both agents were administered with standard-dose CsA (B253) [2], and non-inferior when given with reduced-exposure CsA compared to MMF plus standard-exposure CsA at months 12 and 24 post-transplant (A2310) [9] (Table 2). The German single-center observational study by Lehmkuhl *et al* indicated that a low initial CsA target trough range of 200–250ng/mL during the first month post-transplant, subsequently down-titrated to achieve a reduction of 58% by month 12 is feasible without loss of immunosuppressive efficacy [10].

In B253 the incidence of graft loss and death were comparable between treatment groups [2]. In the A2310 trial, the combination of high-exposure everolimus (target  $C_0$  6–12ng/mL) with CsA and MMF was associated with increased mortality, leading to discontinuation of recruitment to that study arm. In the standard-exposure everolimus group, mortality was similar to the control arm only in the absence of induction therapy. Increased infection-related mortality was observed during the first three months post-transplant in patients receiving standard-exposure everolimus in conjunction with antithymocyte globulin (Thymoglobulin<sup>®</sup>) induction. Further subanalyses revealed an association of deaths in the everolimus group with use of a left ventricular assist device (LVAD) pre-transplant, and that virtually all deaths in patients with LVAD and Thymoglobulin<sup>®</sup> induction occurred in German centers. The German procedure for

selecting high urgent heart transplant recipients for preferred allocation results in a very high-risk population: for example, LVAD patients are only allocated a donor very urgently in the event of technical failure, relapsing strokes or LVAD infection. If these LVAD patients, often with specific risks such as concomitant infection, receive Thymoglobulin<sup>®</sup> induction plus early introduction of an mTOR inhibitor, the intensity of immunosuppression can become suprathreshold. In these patients, everolimus should not be initiated until wound healing is complete and any bacterial or fungal infections have been cleared. By month 24, the mortality rate in the A2310 study was similar in the everolimus and MMF groups (10.6% versus 9.2%, respectively). Other efficacy endpoints were also similar between the two treatment groups, consistent with earlier data from the A2411 trial in *de novo* heart transplant patients (Table 2).

### *Safety profile*

In most cases, the side effects of everolimus (e.g. dyslipidemia, elevated creatine kinase, acne, aphthous stomatitis, edema, pneumonia, proteinuria, leukopenia, thrombocytopenia) are manageable with adjustment of concomitant medication or reduction of everolimus dose, or with interruption of everolimus therapy for a few days [11].

Due to their antiproliferative properties, mTOR inhibitors can impair wound healing after surgery [12]. Clinical evidence regarding an effect on wound healing in heart transplantation is mixed [5, 9, 13]. Randomized studies indicate an elevated incidence of pericardial and possibly pleural effusion (Supplementary Table 1). In the A2310 study, pericardial effusions were most frequent in the everolimus treatment group (43.4% versus 28.4% with MMF at month 12,  $p < 0.001$ ) but rates of pericardial tamponade, pleural effusions, sternal and non-sternal wound healing complications, and wound infections were similar between groups [5, 9, 13] (Supplementary Table 1). The difference in pericardial effusions contributed to a higher overall rate of study drug

discontinuation due to adverse events with everolimus versus MMF at 12 months (29.7% versus 19.0%) although this diminished by month 24 (33.3% versus 25.7%) [10]. The ongoing EVERHEART study (NCT01017029), which is being undertaken in a *de novo* heart transplant population randomized to receive everolimus immediately or with a delay of 4–6 weeks, includes pericardial effusion as a pre-specified endpoint [14].

Viral infection were less frequent with everolimus versus MMF in the A2310 trial, largely accounted for by a lower rate of cytomegalovirus (CMV) infection in everolimus-treated patients (8.2% versus 20.5% with MMF at 12 months,  $p < 0.001$ ; 9.3% versus 23.9% at month 24,  $p < 0.001$ ). These results substantiate similar findings in the A2411 study [5], in B253 study [2], and a recent pooled analysis [15]. The consistent reduction in CMV infection with everolimus versus azathioprine or MMF [2, 5, 9] is independent of CMV prophylaxis and donor/recipient serostatus [9]. Other viral infections such as herpes simplex virus, Epstein-Barr virus, polyoma virus, and herpes zoster virus may be lowered by everolimus but studies have not been designed with these infections as pre-defined endpoints. Of note, although viral infections are reduced, bacterial or fungal infections may be more frequent with everolimus, and avoiding overimmunosuppression is critical to reduce this risk.

### *Renal function*

Neither the A2310 study [9] nor the A2311 trial [5] showed a renal benefit for everolimus versus MMF (Supplementary Table 2). Indeed, non-inferiority of renal function for everolimus versus MMF was not shown in the A2310 study since the lower limit of the confidence interval was lower than the pre-specified margin of  $-10\text{mL/min/1.73m}^2$  (the difference in mean eGFR was  $-5.55\text{mL/min/1.73m}^2$ , 97.5% CI  $[-10.9, -0.2]$  [9]. This was probably due to the absence of CsA dose reduction during the first month post-transplant and subsequent non-adherence to targets for CsA reduction in the everolimus group. It is interesting to note that from month 1 to month 12, when

CsA target levels were lower in everolimus-treated patients, the decline in eGFR was smaller with everolimus versus MMF (-8.6 versus -14.6mL/min/1.73m<sup>2</sup>, p=0.009) [9].

Converting maintenance heart transplant patients from a standard CNI regimen to everolimus with reduced CNI therapy can offer a significant improvement in renal function, as demonstrated in the randomized NOCTET study [6] and during single-center experience [16], even when administered at a low dose [17], although conflicting data exist [8]. CsA dose must be reduced stepwise compared to standard dosing in the presence of everolimus, which can be undertaken without loss of efficacy [18], or the CsA reduction is inadequate to protect renal function. In the event of CNI-related nephrotoxicity, early switch to an mTOR inhibitor appears advisable since the positive effects on renal function are more pronounced if conversion is performed in the first year, although no specific time limit has been established. In the SHIRAKISS trial of 34 maintenance patients with renal dysfunction who were between one and four years post-transplant, conversion to everolimus with a 70% reduction in CsA exposure only improved renal function in patients without proteinuria at the time of conversion [8]. Patients with proteinuria continued to show renal deterioration despite the switch to everolimus therapy. The decision on timing needs to take into account the fact that CNI therapy may be necessary for the first nine months after heart transplantation. Most side effects in maintenance patients occur within six months after starting everolimus and may necessitate a temporary switch back to CNI therapy. In patients with steroid-resistant recurrent myocardial rejection, permanent re-introduction of low-dose CNI may be required.

There is widespread experience in German centers of CNI withdrawal and long-term CNI-free immunosuppression using everolimus in maintenance patients after heart transplantation. Stypmann *et al* described a cohort of 60 patients switched to a CNI-free regimen in response to deteriorating renal function, recurrent rejection or side effects under CNI-based therapy [19]. After 24 months, renal function had improved significantly

(mean [SD] creatinine clearance [Cockcroft-Gault] 41.8 [22] mL/min versus 48.6 [21.8] mL/min at baseline,  $p < 0.001$ ).

#### *Cardiac allograft vasculopathy*

The B253 study of everolimus versus azathioprine in *de novo* heart transplant patients first indicated that everolimus may inhibit the development of cardiac allograft vasculopathy (CAV) [2]. Intravascular ultrasonography (IVUS) studies showed a significant reduction of the average increase of the maximal intimal thickness (MIT) from baseline to month 12 post-transplant in patients receiving everolimus compared to azathioprine, and a significantly lower incidence of CAV (defined as an increase in MIT  $\geq 0.5$  mm) (Table 3). These findings are highly relevant since MIT at 12 and 24 months after heart transplantation predicts subsequent major adverse cardiac events and death [21, 22]. In the A2310 study, IVUS data at month 12 confirmed that the mean increase in MIT was smaller with everolimus than MMF, accompanied by a lower incidence of protocol-defined CAV (Table 3). All other pre-defined IVUS endpoints were also significantly in favor of everolimus [9]. This benefit was observed despite higher mean levels of total cholesterol in everolimus-treated patients [9].

According to ISHLT guidelines everolimus, sirolimus as tolerated, or MMF should be part of the immunosuppression regimen after heart transplantation to reduce the onset and progression of CAV [23]. mTOR inhibition can be substituted for MMF or azathioprine in patients who develop CAV, although data are lacking regarding the effect of late conversion to mTOR inhibition on CAV progression.

#### *Post-transplant malignancy*

mTOR inhibitors exert a direct anti-neoplastic effect by inhibition of the phosphatidylinositol-3-kinase (PI3K) pathway and by sensitization of tumor cells to apoptosis via inhibition of the p53-induced p21 expression regulating abnormal cellular

proliferation and differentiation [24]. A randomized, double-blind, phase 3 trial has demonstrated significantly better progression-free survival in patients with metastatic renal cell carcinoma who received everolimus compared to placebo (RECORD-1) [25, 26]. Everolimus is licensed for the treatment of advanced renal carcinoma and for advanced breast cancer, and is currently under investigation for the management of other types of malignancy.

There are case reports describing regression of Kaposi's sarcoma [27] and malignant neoplasia [28, 29] in kidney transplant recipients following conversion from CNI to everolimus, and Tiberio *et al* have described significant regression of cardiac rhabdomyoma in a patient receiving everolimus [30]. Kusuki *et al* reported a case of successful management of diffuse large B-cell lymphoma 29 months after cardiac transplantation in a 47-month-old boy using minimized CsA in combination with everolimus following rituximab treatment and chemotherapy [31]. Conversion from CNI to everolimus therapy to control malignancy following heart transplantation would seem a reasonable therapeutic approach, particularly for Kaposi's sarcoma, non-melanoma skin cancer and renal cell carcinoma [32] but robust data are lacking. The ongoing multicenter, randomized CERTICOEUR trial (NCT00799188) is comparing the development of new skin cancers in 159 heart transplant patients suffering recurrent skin cancer receiving everolimus and reduced or discontinued CNI therapy versus standard CNI therapy. Importantly, evidence is also growing for a protective role of mTOR inhibitors on the risk of developing new malignancies or non-skin solid tumors following kidney transplantation [32]. Data are awaited in heart transplant recipients.

#### *Pediatric heart transplant recipients*

Minimization of steroids and exposure to CNIs is especially vital in children to reduce the risk of metabolic disorders, renal dysfunction, and cancer. While early withdrawal of steroids is a well established strategy in pediatric transplant recipients, there is only

limited experience with reduced-CNI or CNI-free regimens [33, 34]. Everolimus is not currently licensed in children and its use in pediatric heart transplant patients is largely restricted to high volume centers [35]. There are no randomized trials. Behnke-Hall *et al* have published their experience of switching from CNI therapy to everolimus in 28 children with poor renal function ( $\text{eGFR} < 75 \text{ mL/min/1.73m}^2$ ) at a median of 9.81 years following heart transplantation [36]. All patients were also receiving azathioprine or MMF (those on azathioprine were converted to MMF before the switch to everolimus). In this series, median eGFR increased significantly from the time of conversion ( $47.81 \text{ mL/min/1.73m}^2$ ) to six months ( $63.1 \text{ mL/min/1.73m}^2$ ) and 12 months ( $64.8 \text{ mL/min/1.73m}^2$ ) after conversion (both  $p < 0.05$ ), although three patients experienced rejection and side effects were common. More extensive experience is available in pediatric kidney transplantation [37-39], indicating that *de novo* use of everolimus with CsA offers effective immunosuppression and good renal function to three years post-transplant [39]. Analyzing protocol biopsies at six months after renal transplantation, Kanzelmeyer *et al* found a significantly lower number of pathological changes in patients treated with everolimus and low-dose CNI compared to standard CNI-based treatment [40].

Due to greater oral clearance, pediatric patients may require higher dosages than adults when adjusted according to weight and body surface area, or shorter dosing intervals. In their series of pediatric maintenance heart transplant recipients converted from CNI therapy to everolimus, Behnke-Hall and colleagues targeted an everolimus trough concentration of 5–8 ng/mL, with a mean (SD) starting dose of 0.07 (0.05) mg/kg given in two divided dose. CNI was withdrawn once the everolimus trough concentration was within range. The mean (SD) change in everolimus dose after three months was 0.15 (0.17) mg/kg. In this cohort of 28 patients, three patients experienced acute rejection following switch and three developed infections. Experience from pediatric kidney transplantation suggests that an everolimus trough concentration of 4–6 ng/mL for the

first 6 months post-transplant and then 3–5ng/mL thereafter [41], or more simply a trough level of  $\geq 3$ ng/mL [42], with reduced-concentration CsA, may be adequate. Off-label use in pediatric liver transplant patients is limited, but initial data suggest that a trough concentration in the range 4–6ng/mL with reduced-exposure CsA may be sufficient when introducing everolimus as rescue therapy for chronic graft failure [43].

### **Everolimus administration and dosage regimens**

Everolimus acts synergistically with CsA, such that CsA exposure can be reduced without loss of efficacy. To avoid the risk of potentiating CNI-related nephrotoxicity, CsA exposure should be reduced in the presence of everolimus. Lehmkuhl *et al* reported a reduction in mean CsA trough concentration of 47% at two weeks and 58% at 12 months after transplantation [10] compared to standard dose. A drug-drug interaction between everolimus and tacrolimus, by which everolimus decreases tacrolimus oral bioavailability in a dose-dependent manner [44], means that tacrolimus dose reductions should be smaller than those required for CsA, particularly during the early post-transplant phase, to avoid rejection.

In CNI-free regimens, everolimus should be used in combination with mycophenolic acid.

Everolimus has a shorter half-life than sirolimus (28 hours versus 62 hours) with a more rapid time to steady state (4 days versus 5–7 days) and as a result does not require a loading dose [45-50] (Supplementary Table 3). It is administered twice daily together with the concomitant immunosuppressive medication. Stable trough blood levels (3–8ng/mL) can be obtained after approximately 3–7 days and should be monitored 1–2 times a week initially, then weekly for the following two months, and every 2–4 weeks thereafter. If the everolimus dose or concomitant medication is changed, the frequency of monitoring should be increased until steady state is achieved. The daily dose should not exceed 3.0mg even if the target trough concentration is not achieved other than in a

very few instances (for example in patients receiving co-medication that induces enzymatic induction), when a higher dose may be appropriate for a limited period.

## **Selection of patients for everolimus therapy**

### *De novo heart transplant recipients*

Unless there are special considerations to take into account, all *de novo* heart transplant patients can be considered potential candidates for everolimus-based immunosuppression. Caution should be exercised in certain categories of patients, however, such as those at risk of severe proteinuria, poor wound healing, or patients who have uncontrolled severe hyperlipidemia or a highly elevated risk of infection (Table 4). The potential risk of impaired wound healing and fluid retention at operative sites indicates that delayed initiation of everolimus after transplantation (e.g. approximately 8–14 days) or after other surgical interventions may be helpful although such an approach has shown no benefit in kidney transplantation [51]. Delayed introduction of everolimus has not yet been systematically explored in heart transplantation, but may be most relevant in heart transplant patients with risk factors for poor healing, particularly obesity or diabetes, and in patients with previous coronary artery bypass grafting with bilateral harvesting of the mammarial arteries or those undergoing re-thoracotomy early after transplantation [13, 52].

Routine use of everolimus in the early phase post-transplant is not appropriate in patients with severe end-organ dysfunction prior to transplantation, or in patients on LVAD who are considered to be at high risk for infection or wound healing complications. This is especially the case if LVAD infection was the indication for heart transplantation and Thymoglobulin® is used as induction therapy (or, potentially, to treat early rejection) since the findings of A2310 suggest that this combination may lead to over-immunosuppression.

### *Maintenance heart transplant recipients*

The most frequent reason for introducing everolimus to a maintenance immunosuppression regimen is to support the minimization or withdrawal of CNI therapy, for example in response to impaired renal function or malignancy. In such cases, conversion to a combination of everolimus with mycophenolic acid plus steroids is usually an appropriate option. Additionally, an antimetabolite agent may be switched to everolimus at any time after transplantation with the most likely indications being repeated rejection or adverse events caused by azathioprine or mycophenolic acid. Theoretically, conversion from an antimetabolite to everolimus could be used to inhibit development of CAV progression, but currently there is only very limited clinical experience to suggest that late switch is beneficial in patients with established CAV.

When everolimus is introduced to replace an antimetabolite agent (mycophenolate or azathioprine), the dose of CsA should be reduced immediately at the time of everolimus initiation. For a short period (approximately four days), everolimus should be given in addition to the antimetabolite, which is then withdrawn as soon as an adequate everolimus trough concentration ( $C_0$  3–8ng/mL) is achieved. Close surveillance by echocardiography and at outpatient visits is important during the first weeks after conversion to ensure that acute rejection, while unlikely, is detected promptly.

In cases where everolimus is introduced to substitute for CNI therapy in patients receiving mycophenolic acid, everolimus should be started at a dose of 0.75mg b.i.d., with stepwise reductions in CNI dose. Once the everolimus trough concentration is in the range 3–8ng/mL, the CNI is withdrawn. In patients receiving everolimus with CNI and a CNI-free regimen is sought, MMF can be introduced at a dose of 1.0–1.5g b.i.d. with stepwise withdrawal of CNI starting approximately one week later. In the early period after CNI withdrawal, close observation of allograft function by echocardiography and endomyocardial biopsy coupled with monitoring of everolimus and mycophenolic acid

trough concentrations is very important. Patients who are receiving azathioprine and CNIs also need a stepwise approach to CNI discontinuation. First, azathioprine is replaced by everolimus with a simultaneous 30% reduction in CNI dose. Azathioprine is discontinued as soon as adequate everolimus trough concentrations are reached. In a second step, several weeks later, the CNI dose is reduced stepwise while mycophenolic acid is introduced. Close monitoring of allograft function is again mandatory.

### **Drug interactions**

Everolimus interacts with cytochrome P450 (CYP) enzymes 3A4, 3A5 and 2C8 [53]. Drugs which influence the CYP3A pathway, in particular, affect everolimus metabolism. Concomitant administration of some CYP3A4 inhibitors (e.g. azithromycin, erythromycin, ketoconazole, itraconazole) induce 18–74% reduction in everolimus clearance, resulting in an increased maximum concentration and prolonged everolimus half-life, while others (e.g. calcium channel blockers, quinolones, trimethoprim-sulfamethoxazole) have no relevant effect. CYP3A inducers (rifampicin, phenytoin, carbamazepine) decrease everolimus blood concentration to varying degrees. CsA is metabolized via the CYP3A isoenzyme system and has been shown in single-dose healthy volunteer studies to increase everolimus blood concentration [54] but the steady-state pharmacokinetics of CsA are not influenced by co-administration of everolimus. A reduction in CsA exposure is necessary to avoid CNI-related nephrotoxicity in combination with everolimus.

The combination of tacrolimus and everolimus for prophylaxis of acute rejection after heart transplantation is administered in selected patients in some German centers, although this remains off-label use. There is evidence from kidney transplantation that co-administration of everolimus with tacrolimus reduces tacrolimus exposure [44]. Therefore, tacrolimus dose reduction is considered necessary, although to a lesser extent than for CsA. Tacrolimus does not influence everolimus blood levels, such that higher doses of everolimus are required than in CsA-treated patients to maintain

therapeutic blood levels of everolimus [55]. Tacrolimus is as effective as CsA in combination with everolimus after heart transplantation, and the incidence of serious hypertriglyceridemia is similar [56].

### **Management of adverse events**

Everolimus trough blood concentrations in the range 3–8ng/mL are well tolerated and associated with a low incidence of side effects, but higher levels are not well tolerated. If everolimus trough concentration exceeds 10ng/mL an immediate dosage reduction is likely to be necessary since in addition to a high incidence of everolimus-specific side effects there is an increased risk of over-immunosuppression. Most adverse events are not life-threatening and are responsive to treatment. In clinical practice, preventive measures, optimal screening and management of side effects should be routine. Experienced-based algorithms may help to avoid the need for everolimus discontinuation.

Management strategies for specific types of everolimus-related adverse events in heart transplant recipients have been discussed in detail elsewhere [4, 11] and key aspects are summarized in Table 5. Routine co-medication with lipid-lowering medication is essential in heart transplant patients receiving an mTOR inhibitor. Statin therapy is standard, but in view of the known potential for drug-drug interactions between drugs that affect CYP3A metabolism of everolimus, agents that do not interact with CYP450 should be selected, such as pravastatin, fluvastatin, or fibrates.

### **Discontinuation of everolimus**

Discontinuation of everolimus in heart transplant recipients is associated with a decline in renal function [57] but withdrawal or temporary interruption may be necessary if severe everolimus-related side effects cannot be managed or if surgery is planned. Everolimus can be replaced by MMF using a stepwise switch. In the event of surgery,

this stepwise process should be timed to ensure that everolimus is withdrawn at least seven days before the operation is scheduled. Since adequate blood concentration of MMF requires several days to achieve, overlap of everolimus and MMF administration is advisable for approximately four days. The CNI blood level is likely to increase during everolimus withdrawal and both blood concentrations and renal function should be monitored closely during and after discontinuation. After the side effects have resolved or wound healing is complete, re-introduction of everolimus can be considered.

In patients receiving CNI-free immunosuppression, the risk of postoperative infection must be carefully balanced with the risk of renal function impairment associated with the re-introduction of CNI. For elective major thoracic, abdominal, and retroperitoneal surgery, stepwise re-introduction of CNI in combination with MMF and withdrawal of everolimus is appropriate. This switch should be undertaken approximately two weeks before surgery with re-conversion to a CNI-free regimen as soon as wound healing is completed.

## **Conclusions**

The efficacy of everolimus at a trough concentration of 3–8ng/mL in combination with reduced-exposure CsA is non-inferior to MMF plus full-exposure CsA up to two years after heart transplantation. Data regarding concomitant use of everolimus with tacrolimus remain limited. The side effects which are potentially associated with the use of mTOR inhibitors do not represent a major threat in the clinical situation. In addition, when administered in combination with MMF, everolimus offers the option of CNI-free immunosuppression in selected patients beyond the first year after heart transplantation.

Recent concerns about early increased mortality in the everolimus groups of the A2310 study can be explained by overimmunosuppression in patients with LVAD before transplantation, which arose predominantly from a country-specific effect in Germany. If

patients with LVAD and specific risks such as infection receive Thymoglobulin® induction plus early mTOR inhibition, the intensity of immunosuppression accumulates to an intolerable level with an associated increase in infection-related mortality. Such patients should not receive everolimus before wound healing is completed and any bacterial or fungal infection has been cleared.

The most important benefit of everolimus therapy in heart transplantation may be that its dual mode of action – prevention of acute allograft rejection coupled with suppression of growth factor-driven smooth muscle cell proliferation – combines immunosuppressive potency with reduction of *de novo* CAV disease. The significant reduction in CMV infection in everolimus-treated patients may also contribute to minimization of intimal vascular changes. For the first time, the A2310 study has shown superiority for everolimus versus MMF in all relevant IVUS parameters [9], in accordance with earlier subanalyses from the B253 study comparing everolimus versus azathioprine [2]. Of note, everolimus was initiated early (i.e. within the first 72 hours after transplantation) in both trials. This may be an important detail as many preconditioning events which predispose to CAV start at the time of heart transplantation.

Careful patient selection and individualized immunosuppression is key to achieving optimal outcomes after heart transplantation. Due to its potential to inhibit progression of CAV and to reduce CMV infection, everolimus should be initiated as soon as possible after heart transplantation and be included in standard immunosuppressive regimens if special care is applied in specific patient types and unsuitable patients are excluded (Table 5). Immediate and adequate reduction of CsA exposure is mandatory from the start of everolimus therapy. The findings of the MANDELA and SCHEDULE trials may, in future, support adoption of CNI-free immunosuppression with combined everolimus and MMF therapy beyond six months after heart transplantation, and results of these trials are awaited with interest.

## **Acknowledgements**

A freelance writer (C. Dunstall) edited the draft manuscript which the authors prepared based on an early draft developed by another freelance writer from discussions at meetings of the authors (D. Jansen). Writing support was funded by Novartis Pharma GmbH. The edited draft was then reviewed by all authors and approved prior to submission.

## **Conflict of interest**

Authors' expenses in attending meetings to discuss this manuscript and costs for medical writing assistance were met by Novartis Pharma GmbH, Germany. SWH has received research funding and speaker's honoraria from Novartis. CB has received research funding, speaker's honoraria and travel grants from Novartis, research funding and travel grants from Astellas and Roche, and travel grants from Servier. MJB has received travel grants from Novartis, TEVA, Astellas and Therakos, consulting fees from Novartis and Therakos, and speaker's fees from Novartis, TEVA and Therakos. TD has received research funding, speaker's honoraria and travel grants from Novartis, Astellas and Roche. AOD has received research funding, speaker's honoraria and travel grants from Astellas, Novartis, Roche, Servier and Teva. IK has received research funding and speaker's honoraria from Novartis. JS has received travel grants from Actelion and Novartis, and research funding from Novartis. AH has received travel grants from Astellas and Novartis. HBL has received grant support and speaker's honoraria from Novartis.

## References

1. A. I. Sánchez-Fructuoso, "Everolimus: an update on the mechanism of action, pharmacokinetics and recent clinical trials," *Expert Opinion on Drug Metabolism & Toxicology*, vol. 4, no. 6, pp. 807–819, 2008.
2. H. J. Eisen, M. Tuzcu, R. Dorent et al., "Everolimus for the prevention of allograft rejection and vasculopathy in cardiac-transplant recipients," *New England Journal of Medicine*, vol. 349, no. 9, pp. 847–858, 2003.
3. M. Hummel, "Recommendations for use of Certican (everolimus) after heart transplantation: results from a German and Austrian Consensus Conference," *Journal of Heart & Lung Transplantation*, vol. 24, no. 4 Suppl, pp. S196–200, 2005.
4. M. Rothenburger, A. Zuckermann, C. Bara et al., "Recommendations for the use of Everolimus (Certican) in heart transplantation: Results from the Second German-Austrian Certican Consensus Conference," *Journal of Heart & Lung Transplantation*, vol. 26, no. 4, pp. 305–311, 2007.
5. H. B. Lehmkuhl, J. Arizon, M. Viganò et al; 2411 Study Investigators, "Everolimus with reduced cyclosporine versus MMF with standard cyclosporine in de novo heart transplant recipients," *Transplantation*, vol. 88, no. 1, pp. 115–122, 2009.
6. L. Gullestad, M. Iversen, S. A. Mortensen et al., "Everolimus with reduced calcineurin inhibitor in thoracic transplant recipients with renal dysfunction: a multicenter, randomized trial," *Transplantation*, vol. 89, no. 7, pp. 864–872, 2010.
7. L. Potena, I. G. Bianchi, G. Magnani et al., "Cyclosporine lowering with everolimus or mycophenolate to preserve renal function in heart recipients: a randomized study," *Transplantation*, vol. 89, no. 2, pp. 263–265, 2010.
8. L. Potena, P. Prestinenzi, I. G. Bianchi et al., "Cyclosporine lowering with everolimus versus mycophenolate mofetil in heart transplant recipients: long-term follow-up of the SHIRAKISS randomized, prospective study," *Journal of Heart & Lung Transplantation*, vol. 31, no. 6, pp. 565–570, 2012.

9. H. J. Eisen, J. Kobashigawa, R. C. Starling et al., "Everolimus versus mycophenolate mofetil in heart transplantation: A randomized, multicenter trial," *American Journal of Transplantation*, vol. 13, no. 5, pp. 1203–1216, 2013.
10. H. B. Lehmkuhl, D. Mai, M. Dandel et al., "Observational study with everolimus (Certican) in combination with low-dose cyclosporine in de novo heart transplant recipients," *Journal of Heart & Lung Transplantation*, vol. 26, no. 7, pp. 700–704, 2007.
11. N. Manito, J. F. Delgado, M. G. Crespo-Leiro et al., "Clinical recommendations for the use of everolimus in heart transplantation," *Transplant Reviews (Orlando)*, vol. 24, no. 3, pp. 129–142, 2010.
12. B. Nashan and F. Citterio, "Wound healing complications and the use of mTOR inhibitors in kidney transplantation – a critical review of the literature," *Transplantation*, vol. 94, no. 6, pp. 547–561, 2012.
13. A. Zuckermann, J. M. Arizon, G. Dong et al., "Impact of de novo everolimus-based immunosuppression on incisional complications in heart transplantation," *Transplantation*, vol. 92, no. 5, pp. 594–600, 2011.
14. L. Potena, M. Rinaldi, C. Maiello et al., "Early vs delayed everolimus in de novo heart transplant recipients," *Journal of Heart & Lung Transplantation*, vol. 30, no. 4 Suppl, p. S35, 2011.
15. J. Kobashigawa, H. Ross, C. Bara et al., "Everolimus is associated with a reduced incidence of cytomegalovirus infection following de novo cardiac transplantation," *Transplant Infectious Diseases*, vol. 15, no. 2, pp. 150–162, 2013.
16. U. Fuchs, A. Zittermann, K. Hakim-Meibodi, J. Börgermann, U. Schulz, and J. F. Gummert, "Everolimus plus dosage reduction of cyclosporine in cardiac transplant recipients with chronic kidney disease: a two-year follow-up study," *Transplantation Proceedings*, vol. 43, no. 5, pp. 1839–1846, 2011.

17. U. Fuchs, A. Zittermann, U. Schulz, and J. F. Gummert, "Efficacy and safety of low-dose everolimus as maintenance immunosuppression in cardiac transplant recipients," *Journal of Transplantation*, vol. 2012, no. 976921, 2012.
18. S. Vitko, R. Margreiter, W. Weimar et al., "Everolimus (Certican) 12-month safety and efficacy versus mycophenolate mofetil in de novo renal transplant recipients," *Transplantation*, vol. 78, no. 10, pp. 1532–1540, 2004.
19. J. Stypmann, M. A. Engelen, S. Eckernkemper et al., "Calcineurin inhibitor-free immunosuppression using everolimus (Certican) after heart transplantation: 2 years' follow-up from the University Hospital Münster," *Transplantation Proceedings*, vol. 43, no. 5, pp. 1847–1852, 2011.
20. M. Viganò, M. Tuzcu, R. Benza et al; RAD B253 Study Group, "Prevention of acute rejection and allograft vasculopathy by everolimus in cardiac transplants recipients: a 24-month analysis," *Journal of Heart & Lung Transplantation*, vol. 26, no. 6, pp. 584–592, 2007.
21. M. R. Mehra, H. O. Ventura, D. D. Stapleton, F. W. Smart, T. C. Collins, and S. R. Ramee, "Presence of severe intimal thickening by intravascular ultrasonography predicts cardiac events in cardiac allograft vasculopathy," *Journal of Heart & Lung Transplantation*, vol. 14, no. 4, pp. 632–639, 1995.
22. J. A. Kobashigawa, J. M. Tobis, R. C. Starling et al., "Multicenter intravascular ultrasound validation study among heart transplant recipients: outcomes after five years," *Journal of the American College of Cardiology*, vol. 45, no. 9, pp. 1532–1537, 2005.
23. M. R. Costanzo, A. Dipchand, R. Starling et al., "The International Society of Heart and Lung Transplantation Guidelines for the care of heart transplant recipients," *Journal of Heart & Lung Transplantation*, vol. 29, no. 8, pp. 914–956, 2010.
24. H. Valantine, "Is there a role for proliferation signal/mTOR inhibitors in the prevention and treatment of de novo malignancies after heart transplantation?"

- Lessons learned from renal transplantation and oncology,” *Journal of Heart & Lung Transplantation*, vol. 26, no. 6, pp. 557–564, 2007.
25. R. J. Motzer, B. Escudier, S. Oudard et al., “Efficacy of everolimus in advanced renal cell carcinoma: a double-blind, randomized, placebo-controlled phase III trial,” *Lancet*, vol. 372, no. 9637, pp. 449–456, 2008.
  26. R. J. Motzer, B. Escudier, S. Oudard et al; RECORD-1 Study Group, “Phase 3 trial of everolimus for metastatic renal cell carcinoma,” *Cancer*, vol. 116, no. 18, pp. 4256–4265, 2010.
  27. J. M. Campistol, and F. P. Schena, “Kaposi's sarcoma in renal transplant recipients--the impact of proliferation signal inhibitors,” *Nephrology Dialysis Transplantation*, vol. 22, Suppl. 1, pp. i17–22, 2007.
  28. A. Fernández, R. Marcén, J. Pascual et al., “Conversion from calcineurin inhibitors to everolimus in kidney transplant recipients with malignant neoplasia,” *Transplantation Proceedings*, vol. 38, no. 8, pp. 2453–2455, 2006.
  29. C. Chiurciu, C. A. Carreño, R. Schiavelli et al; Argentinean Registry of Everolimus Treated Renal Transplant Recipients, “Results of the conversion to everolimus in renal transplant recipients with posttransplantation malignancies,” *Transplantation Proceedings*, vol. 42, no. 1, pp. 277–279, 2010.
  30. D. Tiberio, D. N. Franz, and J. R. Phillips, “Regression of a cardiac rhabdomyoma in a patient receiving everolimus,” *Pediatrics*, vol. 127, no. 5, pp. e1335–1337, 2011.
  31. S. Kusuki, Y. Hashii, N. Fukushima et al., “Pediatric post-transplant diffuse large B cell lymphoma after cardiac transplantation,” *International Journal of Hematology*, vol. 89, no. 2, pp. 209–213, 2009.
  32. S. Euvrard, P. Boissonnat, A. Roussoulières et al., “Effect of everolimus on skin cancers in calcineurin inhibitor-treated heart transplant recipients,” *Transplantation International*, vol. 23, no. 8, pp. 855–857, 2010.

33. M. M. Sarwal, "Out with the old, in with the new: immunosuppression minimization in children," *Current Opinion in Organ Transplantation*, vol. 13, no. 5, pp. 513–521, 2008.
34. B. Höcker, and B. Tönshoff, "Calcineurin inhibitor-free immunosuppression in pediatric renal transplantation: a viable option?" *Paediatr Drugs*, vol. 13, no. 1, pp. 49–69, 2011.
35. S.W. Denfield, "Strategies to prevent cellular rejection in pediatric heart transplant recipients," *Paediatric Drugs*, vol. 12, no. 6, pp. 391–403, 2010.
36. K. Behnke-Hall, J. Bauer, J. Thul et al., "Renal function in children with heart transplantation after switching to CNI-free immunosuppression with everolimus," *Pediatric Transplantation*, vol. 15, no. 8, pp. 784–789, 2011.
37. L. Pape, G. Offner, M. Kreuzer et al., "De novo therapy with everolimus, low-dose ciclosporine A, basiliximab and steroid elimination in pediatric kidney transplantation," *American Journal of Transplantation*, vol. 10, no. 10, pp. 2349–2354, 2010.
38. J. M. Kovarik, A. Noe, S. Berthier et al., "Clinical development of an everolimus pediatric formulation: relative bioavailability, food effect, and steady-state pharmacokinetics," *Journal of Clinical Pharmacology*, vol. 43, no. 2, pp. 141–147, 2003.
39. R. Ettenger, P. F. Hoyer, P. Grimm et al; Everolimus Pediatric Study Group, "Multicenter trial of everolimus in pediatric renal transplant recipients: results at three years," *Pediatric Transplantation*, vol. 12, no. 4, pp. 456–63, 2008.
40. N. K. Kanzelmeyer, T. Ahlenstiel, J. Drube et al., "Protocol biopsy-driven interventions after pediatric renal transplantation," *Pediatric Transplantation*, vol. 14, no. 8, pp. 1012–1018, 2010.
41. L. Pape, F. Lehner, C. Blume, and T. Ahlenstiel, "Pediatric kidney transplantation followed by de novo therapy with everolimus, low-dose cyclosporine A, and steroid elimination: 3-year data," *Transplantation*, vol. 92, no. 6, pp. 658–662, 2011.

42. C. Grushkin, J. D. Mahan, K. C. Mange, J. M. Hexham, and R. Ettenger for the Everolimus Pediatric Study Group, "De novo therapy with everolimus and reduced-exposure cyclosporine following pediatric kidney transplantation: A prospective, multicenter, 12-month study," *Pediatric Transplantation*, vol. 17, no. 3, pp. 237–243, 2013.
43. D. Nielsen, A. Briem-Richter, M. Sornsakrin, L. Fischer, B. Nashan, and R. Ganschow, "The use of everolimus in pediatric liver transplant recipients: first experience in a single center," *Pediatric Transplantation*, vol. 15, no. 5, pp. 510–514, 2011.
44. J. Pascual, D. del Castillo, M. Cabello et al., "Interaction between everolimus and tacrolimus in renal transplant recipients: a pharmacokinetic controlled trial," *Transplantation*, vol. 89, no. 8, pp. 994–1000, 2010.
45. Certican® Basic Prescribing Information, Novartis Pharma AG, Basel, Switzerland, 2012.
46. Rapamune® Summary of Product Characteristics, Pfizer, New York, USA. Last updated 2011.
47. G. I. Kirchner, I. Meier-Wiedenbach, and M. P. Manns, "Clinical pharmacokinetics of everolimus," *Clinical Pharmacokinetics*, vol. 43, no. 2, pp. 83–95, 2004.
48. A. Crowe, A. Bruelisauer, L. Duerr, P. Guntz, and M. Lemaire, "Absorption and intestinal metabolism of SDZ-RAD and rapamycin in rats," *Drug Metabolism & Disposition*, vol. 27, no. 5, pp. 627–632, 1999.
49. J. M. Kovarik, H. D. Sabia, J. Figueiredo et al., "Influence of hepatic impairment on everolimus pharmacokinetics: implications for dose adjustment," *Clinical Pharmacology & Therapeutics*, vol. 70, no. 5, pp. 425–430, 2001.
50. W. Schuler, R. Sedrani, S. Cottens S et al., "SDZ RAD, a new rapamycin derivative: pharmacological properties in vitro and in vivo," *Transplantation*, vol. 64, no. 1, pp. 36–42, 1997.

51. L. Albano, F. Berthoux, M. C. Moal MC et al; RAD A2420 Study Group, "Incidence of delayed graft function and wound healing complications after deceased-donor kidney transplantation is not affected by de novo everolimus," *Transplantation*, vol. 88, no. 1, pp. 69–76, 2009.
52. A. Zuckermann, and M. J. Barten, "Surgical wound complications after heart transplantation," *Transplantation International*, vol. 24, no. 7, pp. 627–636, 2011.
53. T. M. Chapman, and C. M. Perry, "Everolimus," *Drugs*, vol. 64, no. 8, pp. 861–872, 2004.
54. J. M. Kovarik, J. Kalbag, J. Figueiredo, M. Rouilly, O. L. Frazier, and C. Rordorf, "Differential influence of two cyclosporine formulations on everolimus pharmacokinetics: A clinically relevant pharmacokinetic interaction," *Journal of Clinical Pharmacology*, vol. 42, no. 1, pp. 95–99, 2002.
55. J. M. Kovarik, J. J. Curtis, D. E. Hricik, M. D. Pescovitz, V. Scantlebury, A. Vasquez, "Differential pharmacokinetic interaction of tacrolimus and cyclosporine on everolimus," *Transplantation Proceedings*, vol. 38, no. 10, pp. 3456–3458, 2006.
56. U. Fuchs, A. Zittermann, B. Schulze et al., "Clinical results of immunosuppressive therapy in heart transplant recipients receiving tacrolimus and everolimus compared to the combination of cyclosporine A and everolimus," *Transplantation*, vol. 90, Suppl 2S, p. 448, 2010.
57. F. Gonzalez-Vilchez, J. A. Vazquez de Prada, L. Almenar et al, "Withdrawal of proliferation signal inhibitors due to adverse events in the maintenance phase of heart transplantation," *Journal of Heart & Lung Transplantation*, vol. 31, no. 3, pp. 288–295, 2012.

**Table 1: Clinical studies of everolimus versus azathioprine or mycophenolate mofetil (MMF) in de novo heart transplant recipients**

| <b>Study</b>          | <b>Design</b>                                                                                                | <b>Primary endpoint</b>                                                                                                  | <b>Everolimus</b>                                                                                                                          | <b>Comparator</b>                                                  | <b>CsA C<sub>0</sub> target range (ng/mL) by month</b>                                                                                                  | <b>Induction therapy</b>                                                               | <b>Steroids</b>                                                                                                                           |
|-----------------------|--------------------------------------------------------------------------------------------------------------|--------------------------------------------------------------------------------------------------------------------------|--------------------------------------------------------------------------------------------------------------------------------------------|--------------------------------------------------------------------|---------------------------------------------------------------------------------------------------------------------------------------------------------|----------------------------------------------------------------------------------------|-------------------------------------------------------------------------------------------------------------------------------------------|
| B253 [2]              | 24 months<br>Multicenter<br>Randomized<br>Double-blind<br>for months 0-12,<br>open-label for<br>months 12-24 | Composite efficacy<br>failure at 6 months                                                                                | Fixed-dose <sup>a</sup><br>1.5 mg/day (n=209)<br>3.0 mg/day (n=211)                                                                        | Azathioprine <sup>a</sup><br>1-3 mg/kg/day<br>(n=214)              | All 3 groups:<br>1: 250-400<br>2-6: 200-350<br>7-24: 100-300                                                                                            | In individual<br>centers only:<br>ATG or<br>muromonab-<br>CD3                          | Prednisolone, initiated at<br>0.5-1.0 mg/kg/day,<br>tapered to achieve<br>0.3-0.5 mg/kg/day by<br>day 21 and ≥0.1<br>mg/kg/day by month 6 |
| Lehmkuhl<br>2007 [10] | 12 months<br>Single center<br>Retrospective                                                                  | Not applicable                                                                                                           | Initial dose pre-<br>transplant 0.75 mg,<br>then mean 1.5-1.75<br>mg/day,<br>C <sub>0</sub> 3-8 ng/mL (n=38)                               | MMF<br>pre-transplant 1.0<br>g, then mean 1.5-<br>2.5 g/day (n=18) | Everolimus vs MMF:<br>1: 200-250, both groups<br>2: 175-200 vs 200-250<br>3-4: 150-175 vs 200-250<br>5-6: 100-150 vs 150-200<br>7-12: 80-120 vs 120-150 | ATG 2.5<br>mg/kg/day on<br>days 1 and 2                                                | Initially, high-dose<br>methylprednisone,<br>then prednisolone 1<br>mg/kg/day, tapered to<br>achieve 0.1 mg/kg/day<br>by month 12         |
| A2411 [3]             | 12 months<br>Multicenter<br>Randomized<br>Open-label                                                         | Non-inferiority of<br>renal function<br>(calculated<br>creatinine clearance<br>at 6 months)                              | Initial dose <sup>a</sup><br>1.5 mg/day,<br>C <sub>0</sub> 3-8 ng/mL (n=92)                                                                | MMF <sup>a</sup><br>3.0 g/day<br>(n=84)                            | Everolimus vs MMF:<br>1: 200-350, both groups<br>2: 150-250 vs 200-350<br>3-4: 100-200 vs 200-300<br>5-6: 75-150 vs 150-250<br>7-12: 50-100 vs 100-250  | Antithymocyte<br>antibodies (68.4%<br>of patients) or<br>IL-2RA (25.9%<br>of patients) | Prednisone, tapered to<br>achieve ≥0.1 mg/kg/day<br>by month 6 and 0.1-0.05<br>mg/kg/day from month 6-<br>12                              |
| A2310 [9]             | 24 months<br>Multicenter<br>Randomized<br>Open-label                                                         | Non-inferiority of<br>composite efficacy<br>failure at 12 months<br>IVUS substudy:<br>change in mean MIT<br>at 12 months | Initial dose <sup>a</sup><br>1.5 mg/day,<br>C <sub>0</sub> 3-8 ng/mL<br>(n=282), or<br>3.0 mg/day,<br>C <sub>0</sub> 6-12 ng/mL<br>(n=168) | MMF <sup>a</sup><br>3.0 g/day<br>(n=271)                           | Everolimus vs MMF:<br>1: 200-350, both groups<br>2: 150-250 vs 200-350<br>3-4: 100-200 vs 200-300<br>5-6: 75-150 vs 150-250<br>7-24: 50-100 vs 100-250  | Center-specific:<br>No induction or<br>Thymoglobulin<br>or basiliximab                 | Yes, according to local<br>practice                                                                                                       |



**Table 2:** Efficacy endpoints in randomized trials of everolimus with reduced-exposure cyclosporine versus MMF with standard-exposure cyclosporine

|                                             | <b>A2310 [9]</b> |                          |                  |                          | <b>A2411 [5]</b> |                          |
|---------------------------------------------|------------------|--------------------------|------------------|--------------------------|------------------|--------------------------|
|                                             | <b>12 months</b> |                          | <b>24 months</b> |                          | <b>12 months</b> |                          |
| <b>Parameter</b>                            | <b>MMF</b>       | <b>Everolimus 1.5 mg</b> | <b>MMF</b>       | <b>Everolimus 1.5 mg</b> | <b>MMF</b>       | <b>Everolimus 1.5 mg</b> |
| Number of patients                          | 271              | 282                      | 271              | 282                      | 84               | 92                       |
| Composite efficacy failure <sup>a</sup> , % | 33.6             | 35.1 <sup>b</sup>        | 41.3             | 39.4 <sup>c</sup>        | 41.7             | 32.6                     |
| AR associated with HDC, %                   | 2.6              | 3.9                      | 5.2              | 4.3                      | 1.2              | 2.2                      |
| BPAR, ISHLT grade ≥3A, %                    | 24.7             | 22.3                     | 27.3             | 24.1                     | 29.8             | 22.8 <sup>d</sup>        |
| BPAR treated with antibody, %               | No data          | No data                  | No data          | No data                  | 2.4              | 5.4                      |
| Graft loss/re-transplant, %                 | 1.8              | 1.4                      | 3.7              | 2.5                      | Composite:       | Composite:               |
| Death, %                                    | 4.8              | 7.8 <sup>e</sup>         | 9.2              | 10.6 <sup>e</sup>        | 11.9             | 10.9                     |
| Loss to follow-up, %                        | 3.7              | 3.2                      | 5.2              | 3.5                      | No data          | No data                  |

AR, acute rejection; BPAR, biopsy proven acute rejection; HDC, hemodynamic compromise; ISHLT, International Society of Heart and Lung Transplantation; MMF, mycophenolate mofetil

<sup>a</sup> Defined as BPAR grade ≥3A (or any BPAR in A2310). acute rejection associated with hemodynamic compromise, graft loss/retransplant, death, or loss to follow-up

<sup>b</sup> p=0.002 for non-inferiority (non-inferiority margin 13%); p=0.705 for no-difference test

<sup>c</sup> Non-inferior to the MMF group (non-inferiority margin 13%)

<sup>d</sup> p=0.005 for non-inferiority

<sup>e</sup> Including one death in a patient who never received everolimus

**Table 3:** Results of intravascular ultrasound (IVUS) substudies in randomized trials of everolimus with reduced-exposure cyclosporine versus MMF with standard-exposure cyclosporine

| Parameter                               | A2310 [9]   |                      |            | B253 [2, 20] |                             |               |
|-----------------------------------------|-------------|----------------------|------------|--------------|-----------------------------|---------------|
|                                         | MMF         | Everolimus<br>1.5 mg | P<br>value | Azathioprine | Everolimus<br>1.5 mg/3.0 mg | P<br>value    |
| Number of patients                      |             |                      |            |              |                             |               |
| 12 months                               | 101         | 88                   |            | 72           | 70 / 69                     |               |
| 24 months                               | -           | -                    |            | 60           | 45 / 44                     |               |
| Mean change in MIT<br>from baseline, mm |             |                      |            |              |                             |               |
| 12 months                               | 0.07 ± 0.11 | 0.03 ± 0.05          | <0.00      | 0.10         | 0.04 / 0.03                 | 0.01 / 0.003  |
| 24 months                               | -           | -                    | 1          | 0.15         | 0.07 / 0.06                 | 0.014 / 0.004 |
| Patients with CAV, %                    |             |                      |            |              |                             |               |
| 12 months                               | 26.7        | 12.5                 | 0.018      | 52.8         | 35.7 / 30.4                 | 0.045 / 0.01  |
| 24 months                               | -           | -                    |            | 58.3         | 33.3 / 45.5                 | 0.017 / n.s.  |

CAV, cardiac allograft vasculopathy, defined as change in MIT  $\geq 0.5$  mm as assessed by intravascular ultrasound (IVUS); MIT, maximal intimal thickness; MMF, mycophenolate mofetil

**Table 4:** Patient selection for everolimus-based immunosuppression in *de novo* heart transplant recipients\*

| Category                                                                                                                | Remarks                                                                                                                                                                                             |
|-------------------------------------------------------------------------------------------------------------------------|-----------------------------------------------------------------------------------------------------------------------------------------------------------------------------------------------------|
| <b>Everolimus</b>                                                                                                       |                                                                                                                                                                                                     |
| All <i>de novo</i> heart transplant recipients except for those with special conditions and/or risks (see below)        | Check all patients for possibility of everolimus therapy due to its potential to reduce CNI-related toxicity, CMV infection, malignancy risk and CAV                                                |
| <b>Everolimus only with special care</b>                                                                                |                                                                                                                                                                                                     |
| Specific risks for renal impairment or creatinine increase                                                              | Reduce CsA exposure to a minimum, monitor urine electrophoresis and proteinuria, stop everolimus in the event of proteinuria >1g/day and/or signs of new glomerular damage on urine electrophoresis |
| Risks for wound healing disorders (diabetes mellitus, obese patients, high steroid exposure, ventricular assist device) | Delay initiation of everolimus until completion of wound healing and resolution of any bacterial or fungal infection                                                                                |
| Uncontrolled severe hyperlipidemia                                                                                      | Delay initiation of everolimus until serum lipids have been controlled<br>Always administer everolimus in combination with lipid-lowering therapy e.g. fluvastatin                                  |
| <b>Everolimus not appropriate</b>                                                                                       |                                                                                                                                                                                                     |
| - Paracorporeal biventricular assist device with immanent risk of infection                                             | Avoid anti-lymphocyte antibodies for induction in patients with elevated risk for early postoperative infection                                                                                     |
| - Infected ventricular assist device                                                                                    |                                                                                                                                                                                                     |
| - LVAD in conjunction with specific risks such as combination of Thymoglobulin induction and infection                  | everolimus may be initiated after completion of wound healing and resolution of any bacterial or fungal infection                                                                                   |
| - Latent bacterial or fungal infections                                                                                 | Everolimus may be unsuitable in individual cases based on benefit/risk assessment                                                                                                                   |
| - High probability of re-operation or necessity for additional surgery in the initial phase                             | Consider late initiation of everolimus to avoid need to switch immunosuppressive regimen during a critical period                                                                                   |
| - GFR <40mL/min/1.73m <sup>2</sup> if slope shows an ongoing deterioration of renal function                            | Delay initiation of everolimus<br>everolimus may be initiated if CNI exposure requires marked reduction                                                                                             |

\* Initiation within 72 hours after transplantation

CAV, cardiac allograft vasculopathy; CNI, calcineurin inhibitor; CsA, cyclosporine; GFR, glomerular filtration rate; LVAD, left ventricular assist device

**Table 5:** Overview of selected everolimus-associated adverse events

| <b>Adverse event</b>                            | <b>Comment</b>                                                                                                                                                                                                                                                                | <b>Prevention/Intervention</b>                                                                                                                                                                                                                                                                                                                                                                                                                                                                                         |
|-------------------------------------------------|-------------------------------------------------------------------------------------------------------------------------------------------------------------------------------------------------------------------------------------------------------------------------------|------------------------------------------------------------------------------------------------------------------------------------------------------------------------------------------------------------------------------------------------------------------------------------------------------------------------------------------------------------------------------------------------------------------------------------------------------------------------------------------------------------------------|
| Dyslipidemia                                    |                                                                                                                                                                                                                                                                               | Co-medication with lipid-lowering medication is mandatory (statin not interacting with CYP450 e.g. fluvastatin, or fibrates)                                                                                                                                                                                                                                                                                                                                                                                           |
| Pancytopenia                                    |                                                                                                                                                                                                                                                                               | In unexplained cytopenia (white blood cells, red cells, platelets), everolimus may be the cause and dose reduction or temporary cessation may be indicated                                                                                                                                                                                                                                                                                                                                                             |
| Acne                                            |                                                                                                                                                                                                                                                                               | Improves within a few weeks using local treatment                                                                                                                                                                                                                                                                                                                                                                                                                                                                      |
| Aphthous stomatitis                             |                                                                                                                                                                                                                                                                               | Local treatment is effective                                                                                                                                                                                                                                                                                                                                                                                                                                                                                           |
| Angioneurotic edema                             |                                                                                                                                                                                                                                                                               | Discontinue ACE inhibitor co-medication                                                                                                                                                                                                                                                                                                                                                                                                                                                                                |
| Creatine kinase (CK) elevation<br>Muscle cramps | May be related to everolimus overexposure or/and to co-medication of statin therapy                                                                                                                                                                                           | Everolimus trough concentration should be adjusted to the lower margin of the target range for several days and/or statin therapy should be stopped temporarily. If this is not effective, consider a temporary switch from everolimus to MMF<br>In most cases, careful re-introduction of everolimus can be undertaken successfully after normalization of CK level and resolution of muscle cramps.<br>Selected patients with persistent CK levels >10-fold higher than normal may be referred for muscle biopsy [5] |
| Increased proteinuria                           | May reflect physiological tubular proteinuria due to mTOR inhibition, which is reversible and without clinical relevance as it does not reflect damage to renal tissue<br>Proteinuria >1g/day indicates a glomerular process and may be due to an everolimus-associated event | Concomitant prescription of ACE inhibitor or angiotensin-receptor blockers may reduce the incidence of new onset proteinuria<br>As proteinuria <1g/day does not exclude glomerular damage, urine protein electrophoresis can be performed to detect glomerular proteins                                                                                                                                                                                                                                                |
| Non-infectious pneumonia                        | More likely to occur during sirolimus treatment in cancer patients                                                                                                                                                                                                            | Requires dose reduction or discontinuation and anti-inflammatory treatment by high-dose steroids. Frequent radiologic assessment is mandatory and laboratory values should be monitored twice a week                                                                                                                                                                                                                                                                                                                   |
| Impaired wound healing                          | Elevated risk early postoperatively in high risk patients (e.g. diabetes, LVAD, re-do surgery, high dose steroids) due to anti-proliferative properties of mTOR inhibitors                                                                                                    | Delayed onset of everolimus after transplant surgery, or temporary interruption during subsequent major surgery, may be helpful. In the event of minor local surgery in low-risk patients, everolimus therapy can be continued                                                                                                                                                                                                                                                                                         |
| Pericardial/pleural effusion                    | Elevated incidence early after heart transplantation                                                                                                                                                                                                                          | Manageable by frequent monitoring with echocardiography/sonography, symptomatic diuretic treatment and drainage on demand                                                                                                                                                                                                                                                                                                                                                                                              |

ACE, angiotensin converting enzyme; LVAD, left ventricular assist device; MMF, mycophenolate mofetil; mTOR, mammalian target-of-rapamycin inhibitor

**Supplementary Table 1:** Wound healing complications and effusions in randomized trials of everolimus with reduced-exposure cyclosporine versus MMF with standard-exposure cyclosporine

|                                    | <b>A2310 (12 months) [i]</b> |                              | <b>A2411 [ii, iii]</b> |                              |
|------------------------------------|------------------------------|------------------------------|------------------------|------------------------------|
| <b>Parameter</b>                   | <b>MMF</b>                   | <b>Everolimus<br/>1.5 mg</b> | <b>MMF</b>             | <b>Everolimus<br/>1.5 mg</b> |
| Number of patients                 | 268                          | 279                          | 83                     | 91                           |
| Wound healing events               |                              |                              |                        |                              |
| Sternal                            | 19.4                         | 24.4                         | No data                | No data                      |
| Incision-site associated           | No data                      | No data                      | 7.2 <sup>a</sup>       | 4.4 <sup>a</sup>             |
| Non-sternal                        | 13.1                         | 13.3                         | No data                | No data                      |
| Dehiscence                         | 4.9                          | 3.6                          | 0 <sup>a</sup>         | 3.3 <sup>a</sup>             |
| Mediastinitis                      | 0.7                          | 1.8                          | 0 <sup>a</sup>         | 0 <sup>a</sup>               |
| Postoperative wound infections     | No data                      | No data                      | 8.6                    | 6.6                          |
| Pericardial effusion, %            | 28.4                         | 43.4 <sup>b</sup>            | 25.3                   | 35.3                         |
| Pericardial tamponade <sup>c</sup> | 3.0                          | 5.7                          | 4.8                    | 5.5                          |
| Any pleural effusion               | 23.1                         | 28.0                         | 13.3                   | 24.2                         |

MMF, mycophenolate mofetil

<sup>a</sup> Reference 10 (data at 90 days post-transplant)

<sup>b</sup>  $p < 0.001$  everolimus versus MMF

<sup>c</sup> Echocardiography indicating evolving cardiac tamponade

## References

- i. Eisen H, Kobashigawa J, Starling RC, Pauly DF, Kfoury A, Ross H, et al. Everolimus versus mycophenolate mofetil in heart transplantation: A randomized, multicenter trial. *Am J Transplant* 2013;13:1203-16.
- ii. Lehmkuhl HB, Arizon J, Viganò M, Almenar L, Gerosa G, Maccherini M, et al; 2411 Study Investigators. Everolimus with reduced cyclosporine versus MMF with standard cyclosporine in de novo heart transplant recipients. *Transplantation* 2009;88:115-22.
- iii. Lehmkuhl HB, Arizon J, Viganò M, Almenar L, Gerosa G, Maccherini M, et al; 2411 Study Investigators. Everolimus with reduced cyclosporine versus MMF with standard cyclosporine in de novo heart transplant recipients. *Transplantation* 2009;88:115-22.

**Supplementary Table 2:** Renal function in randomized trials of everolimus with reduced-exposure cyclosporine versus MMF with standard-exposure cyclosporine

| Parameter                              | A2310 [i] |                      | A2411 [ii] |                      |
|----------------------------------------|-----------|----------------------|------------|----------------------|
|                                        | MMF       | Everolimus<br>1.5 mg | MMF        | Everolimus<br>1.5 mg |
| Number of patients                     | 271       | 282                  | 83         | 91                   |
| Mean eGFR (mL/min/1.73m <sup>2</sup> ) |           |                      |            |                      |
| Baseline                               | 67        | 67                   | -          | -                    |
| Month 12                               | 65        | 59 <sup>a</sup>      | -          | -                    |
| Month 24                               | 65        | 60 <sup>b</sup>      | -          | -                    |
| Mean creatinine clearance (mL/min)     |           |                      |            |                      |
| Baseline                               | -         | -                    | 76.8       | 72.5                 |
| Month 12                               | -         | -                    | 71.8       | 68.7                 |

eGFR, estimated glomerular filtration rate; MMF, mycophenolate mofetil

<sup>a</sup> P=0.009 for everolimus vs MMF

<sup>b</sup> P=0.020 for everolimus vs MMF

#### References

- i. Lehmkuhl HB, Arizon J, Viganò M, Almenar L, Gerosa G, Maccherini M, et al; 2411 Study Investigators. Everolimus with reduced cyclosporine versus MMF with standard cyclosporine in de novo heart transplant recipients. *Transplantation* 2009;88:115-22.
- ii. Eisen H, Kobashigawa J, Starling RC, Pauly DF, Kfoury A, Ross H, et al. Everolimus versus mycophenolate mofetil in heart transplantation: A randomized, multicenter trial. *Am J Transplant* 2013;13:1203-16.

**Supplementary Table 3:** Pharmacokinetics and dosing characteristics of everolimus and sirolimus

| Parameter                                       | Everolimus [i]                    | Sirolimus [ii] <sup>a</sup> |
|-------------------------------------------------|-----------------------------------|-----------------------------|
| Polarity                                        | Greater than sirolimus [iii]      |                             |
| Oral bioavailability in rats [iv]               | 16%                               | 10%                         |
| Plasma protein binding                          | 74% [v]                           | 92%                         |
| Half-life                                       | 28±7 hours                        | 62±16 hours                 |
| Time to steady state                            | 4 days                            | 5–7 days                    |
| Dosing interval                                 | Twice daily                       | Once daily                  |
| Loading dose                                    | No                                | 6 mg                        |
| Tablet options (mg)                             | 0.25, 0.5, 0.75, 1.0              | 1, 2                        |
| Concomitant dosing with CsA                     | Yes                               | 4 hours after CsA dose      |
| Target trough concentration                     | 3–8ng/mL                          | 4–12ng/mL                   |
| Affinity to FKBP12 <sup>b</sup> <i>in vitro</i> | 2-fold weaker than sirolimus [vi] |                             |

CsA, cyclosporine

<sup>a</sup> Sirolimus (Rapamune) Summary of Product Characteristics refers to kidney transplantation only

<sup>b</sup> FKBP12: FK 506 (tacrolimus)-binding protein

## References

- i. Certican® Basic Prescribing Information, Novartis Pharma AG, Basel, Switzerland, 2012.
- ii. Rapamune® Summary of Product Characteristics, Pfizer, New York, USA. Last updated 2011.
- iii. Kirchner GI, Meier-Wiedenbach I, Manns MP. Clinical pharmacokinetics of everolimus. Clin Pharmacokinet 2004;43:83-95.
- iv. Crowe A, Bruelisauer A, Duerr L, Guntz P, Lemaire M. Absorption and intestinal metabolism of SDZ-RAD and rapamycin in rats. Drug Metab Dispos 1999;27:627-32.
- v. Kovarik JM, Sabia HD, Figueiredo J, Zimmermann H, Reynolds C, Dilzer SC, et al. Influence of hepatic impairment on everolimus pharmacokinetics: implications for dose adjustment. Clin Pharmacol Ther 2001;70:425-30.
- vi. Schuler W, Sedrani R, Cottens S, Häberlin B, Schulz M, Schuurman HJ, et al. SDZ RAD, a new rapamycin derivative: pharmacological properties in vitro and in vivo. Transplantation 1997;64:36-42.
